# Supplementary material for: Prediction of Response to Immune Checkpoint Blockade in Patients with Metastatic Colorectal Cancer with Microsatellite Instability
Source: Research Square preprint supplement (doi:10.21203/rs.3.rs-1650336/v1), 2022-05-31
Supplement: Supplementary file 1 [file 559a093b50ad26b724bf1a88.xlsx]

## Sheet: Sheet 1
Sgnature	NIPICOL_C1_HR	NIPICOL_C1_logRankPvalue	TotalImmunoMSI_C2_HR	TotalImmunoMSI_C2_logRankPvalue	ComboOnlyImmunoMSI_C2_HR	ComboOnlyImmunoMSI_C2_logRankPvalue
xcell.Myeloid.dendritic.cell.activated	1.03689	0.489338	794.81	0.103437	15976.5	0.0319336
xcell.B.cell	0.925051	0.535872	0.00525277	0.557943	0.000344428	0.559642
xcell.T.cell.CD4..memory	0.481428	0.260044	1.04998e-15	0.69254	4.10393e-24	0.724212
xcell.T.cell.CD4..naive	1.11108	0.662865	0.382634	0.937878	0.429671	0.946301
xcell.T.cell.CD4...non.regulatory.	0.865466	0.808174	66.535	0.892797	57189.7	0.721095
xcell.T.cell.CD4..central.memory	5.03486e-216	0.462642	#NUM!	0.117504	#NUM!	0.763885
xcell.T.cell.CD4..effector.memory	1.19653	0.407957	5.74713e+07	0.781962	#NUM!	0.977307
xcell.T.cell.CD8..naive	0.836014	0.365053	4.31461e-07	0.585216	2.25779e-08	0.709099
xcell.T.cell.CD8.	1.4165	0.0724744	3497.3	0.73991	1.20365e+07	0.489474
xcell.T.cell.CD8..central.memory	0.925423	0.754695	57.9711	0.866788	525062	0.593569
xcell.T.cell.CD8..effector.memory	9.25204	0.0323647	6323.09	0.79842	18814.3	0.778678
xcell.Class.switched.memory.B.cell	0.232787	0.247778	6.99469e-05	0.587549	1.55466e-48	0.512927
xcell.Common.lymphoid.progenitor	0.820362	0.0754535	6.70167e-05	0.387236	1.25843e-10	0.237079
xcell.Common.myeloid.progenitor	2.31343	0.3923	3.40396e+46	0.282954	2.14952e+48	0.330957
xcell.Myeloid.dendritic.cell	1.08956	0.925884	3.5772e+13	0.312426	3.97384e+20	0.1909
xcell.Endothelial.cell	1.1396	0.0543613	7073.44	0.367921	2.33362e+11	0.13229
xcell.Eosinophil	#NUM!	0.689657	1.54209e+110	0.14352	0	0.818427
xcell.Cancer.associated.fibroblast	1.05858	0.00153405	16.6166	0.483099	3518.92	0.0887499
xcell.Granulocyte.monocyte.progenitor	1.48613	0.567229	1.07914e-12	0.796407	8.42918e-07	0.896924
xcell.Hematopoietic.stem.cell	1.03371	0.136639	119.657	0.119454	2752.45	0.122753
xcell.Macrophage	1.34458	0.111166	1.14469e+07	0.451102	1.14987e+08	0.545845
xcell.Macrophage.M1	1.20261	0.607757	3.83302e+16	0.26824	2.67131e+25	0.131109
xcell.Macrophage.M2	1.83096	0.0350091	1331591474917080	0.131979	5900703676816429	0.325745
xcell.Mast.cell	0.938634	0.963266	1.16511e-22	0.617703	1.53573e-121	0.273848
xcell.B.cell.memory	0.739047	0.504176	6.62773e-05	0.5497	5.30332e-06	0.585919
xcell.Monocyte	1.20094	0.0279373	2.89159e+06	0.22758	23147.3	0.710213
xcell.B.cell.naive	2.59884e-45	0.390483	3.10938e-21	0.596562	0	0.58398
xcell.Neutrophil	1.15374	0.157448	1.72145e+18	0.118817	1.8951e+34	0.554325
xcell.T.cell.NK	0.988029	0.585745	66.6703	0.273695	40.81	0.512716
xcell.Plasmacytoid.dendritic.cell	0.337968	0.294577	4.72252e-37	0.468462	4.4864e-14	0.616577
xcell.B.cell.plasma	0.7961	0.370503	8.16047e-13	0.479537	1.21303e-50	0.0843986
xcell.T.cell.CD4..Th1	0.95505	0.43037	0.327689	0.847528	0.0297126	0.708878
xcell.T.cell.CD4..Th2	0.878976	0.0455435	5.86981	0.799403	3.37903e-14	0.360169
xcell.T.cell.regulatory..Tregs.	1.2917	0.222702	0.0125514	0.770344	4.94857e+06	0.440687
xcell.immune.score	1.06703	0.280553	0.715539	0.918787	0.313439	0.783778
xcell.stroma.score	1.07879	0.00598454	127.555	0.445852	2.54019e+06	0.0894464
xcell.microenvironment.score	1.0773	0.00402198	1.54616	0.842221	1.83574	0.790827
epic.B.cell	0.807226	0.516878	1.34641	0.989501	5.70824e-30	0.174285
epic.Cancer.associated.fibroblast	6.25724	0.220575	1.1219e+154	0.0445514	2.25672e+276	0.0093526
epic.T.cell.CD4.	0.900843	0.502042	6.28248e+07	0.164099	2.86413e+17	0.0898682
epic.T.cell.CD8.	0.964187	0.740919	0.406487	0.935874	0.00453021	0.765216
epic.Endothelial.cell	1.44258	0.136952	4.30993e+20	0.0428549	8.27572e+37	0.0141979
epic.Macrophage	10.3953	0.414976	2.07084e+223	0.134423	#NUM!	0.126724
epic.uncharacterized.cell	1.01413	0.859997	9.99114e-05	0.134536	0.000471863	0.340579
cibersort.B.cell.naive	0.882183	0.301468	0	0.57914	0	0.582606
cibersort.B.cell.memory	0.97603	0.728639	1.07269	0.990966	3.81954e-05	0.464579
cibersort.B.cell.plasma	0.958679	0.608424	0.665997	0.933502	3.57654e-05	0.19543
cibersort.T.cell.CD8.	0.94908	0.431826	0.000504474	0.273458	1.89672e-05	0.327747
cibersort.T.cell.CD4..naive	1.18151	0.457587	0	0.482875	0	0.584892
cibersort.T.cell.CD4..memory.resting	1.00127	0.969016	8.85805	0.501455	14.3359	0.607834
cibersort.T.cell.CD4..memory.activated	0.823092	0.447699	0.15636	0.898264	3.26719	0.959833
cibersort.T.cell.follicular.helper	0.798554	0.364879	2.0015e-06	0.409828	1.32979e-05	0.627971
cibersort.T.cell.regulatory..Tregs.	0.956329	0.789801	0.000378087	0.577917	0.00132535	0.728098
cibersort.NK.cell.resting	0.961799	0.713996	16.9875	0.678323	731170	0.425604
cibersort.NK.cell.activated	0.942307	0.580543	3.20859	0.887024	9.16376	0.856205
cibersort.Monocyte	1.10578	0.247511	61415.2	0.0984911	3.03746e+08	0.0796431
cibersort.Macrophage.M0	0.991978	0.872166	2.68365	0.80572	1.0641	0.99213
cibersort.Macrophage.M1	0.880321	0.308647	10.1396	0.880615	551122	0.568522
cibersort.Macrophage.M2	1.06321	0.0791822	0.0792593	0.525904	0.927425	0.989224
cibersort.Myeloid.dendritic.cell.resting	0.912802	0.775998	0	0.553551	0	0.850107
cibersort.Myeloid.dendritic.cell.activated	0.68641	0.280208	4.18446e+10	0.0564165	2.13109e+17	0.0122751
cibersort.Mast.cell.activated	1.04191	0.82249	1.01445	0.999127	1.68654e+07	0.352608
cibersort.Mast.cell.resting	1.02271	0.580395	0.000410645	0.436615	0.302488	0.936748
cibersort.Eosinophil	1.05551	0.815304	1.05093e-43	0.560929	0	0.506954
cibersort.Neutrophil	1.03052	0.515072	0.467972	0.951191	1.98203e-05	0.686256
cibersortabs.B.cell.naive	0.632427	0.499873	0	0.582837	1.20459e-07	0.583894
cibersortabs.B.cell.memory	1.17524	0.664678	0.979847	0.628275	0.872897	0.498505
cibersortabs.B.cell.plasma	1.05872	0.900535	0.982882	0.740595	0.855422	0.0782755
cibersortabs.T.cell.CD8.	0.998436	0.996675	0.950774	0.368974	0.935681	0.413636
cibersortabs.T.cell.CD4..naive	2.55497	0.398165	9.01949e-14	0.496401	3.03082e-07	0.584892
cibersortabs.T.cell.CD4..memory.resting	1.15527	0.346676	1.00294	0.858936	0.999073	0.967938
cibersortabs.T.cell.CD4..memory.activated	0.0301695	0.206364	0.981993	0.900755	1.04009	0.856478
cibersortabs.T.cell.follicular.helper	0.0274433	0.225163	0.919523	0.548329	0.937106	0.733832
cibersortabs.T.cell.regulatory..Tregs.	1.03219	0.97699	0.956087	0.736415	0.944011	0.740693
cibersortabs.NK.cell.resting	0.751909	0.704366	1.03175	0.630969	1.09282	0.400904
cibersortabs.NK.cell.activated	0.584097	0.561472	0.992303	0.926948	0.977031	0.844495
cibersortabs.Monocyte	1.84106	0.216791	1.02904	0.527801	1.02457	0.685077
cibersortabs.Macrophage.M0	1.24754	0.470869	1.02946	0.461909	0.981561	0.78561
cibersortabs.Macrophage.M1	0.895838	0.868324	1.11996	0.410165	1.22836	0.316491
cibersortabs.Macrophage.M2	1.37152	0.0514582	0.969536	0.458687	0.986048	0.813174
cibersortabs.Myeloid.dendritic.cell.resting	0.539143	0.791818	6.83447e-159	0.549901	9.9833e-157	0.850107
cibersortabs.Myeloid.dendritic.cell.activated	0.248682	0.41805	1.17867	0.212723	1.4372	0.0590648
cibersortabs.Mast.cell.activated	1.10824	0.931816	0.955842	0.756517	1.17441	0.411152
cibersortabs.Mast.cell.resting	1.30904	0.180136	0.926536	0.473128	0.945541	0.710259
cibersortabs.Eosinophil	118.164	0.0725267	0.434047	0.580823	1.15757e-25	0.496812
cibersortabs.Neutrophil	1.22065	0.407797	1.01767	0.814709	0.850048	0.563456
mcpcount.Tcells	0.949116	0.864806	0.892235	0.593928	0.790212	0.462183
mcpcount.CD8Tcells	0.999044	0.993958	0.944604	0.613167	0.856168	0.477422
mcpcount.Cytotox.lymph	0.840512	0.530959	1.12937	0.551264	0.854921	0.636956
mcpcount.NK	1.15529	0.671221	0.649485	0.128643	0.627622	0.337209
mcpcount.B.lineage	0.912879	0.676119	0.933051	0.702454	0.519841	0.183016
mcpcount.Mono.lineage	2.87699	0.0297635	1.20081	0.586992	1.21431	0.660641
mcpcount.Myeloid.dendritic	1.06663	0.837266	1.02427	0.93327	1.23691	0.544865
mcpcount.Neutrophils	1.2349	0.392902	0.682417	0.29933	0.425522	0.22613
mcpcount.Endothelial	1.92904	0.0651248	0.799528	0.670539	0.542567	0.451246
mcpcount.Fibroblasts	2.10084	0.0128592	0.941571	0.892322	3.13111	0.180261
Estimate.StromalScore	1.00049	0.0225987	1.00027	0.28178	1.00066	0.073187
Estimate.ImmuneScore	1.00034	0.263174	1.00025	0.247327	1.00031	0.243613
Estimate.ESTIMATEScore	1.00029	0.0377519	1.00015	0.232339	1.00024	0.119553
