# Supplementary material for: Prediction of Response to Immune Checkpoint Blockade in Patients with Metastatic Colorectal Cancer with Microsatellite Instability
Source: Research Square preprint supplement (doi:10.21203/rs.3.rs-1650336/v1), 2022-05-31
Supplement: Supplementary file 2 [file b63f48466f874f9094930666.xlsx]

## Sheet: Sheet1
ID	Cohort	Age	Sex	Status	DNA	RNA	Drug	Response	PFS	Event
IMSI_0150	Nipicol	50	Female	MSI	Exome	RNAseq	Anti-PD1 | Anti-CTLA-4	SD	25.2977	0
IMSI_0153	Nipicol	54	Male	MSI	Exome	RNAseq	Anti-PD1 | Anti-CTLA-4	PR	25.6263	0
IMSI_0188	Nipicol	49	Male	MSI	NA	RNAseq	Anti-PD1 | Anti-CTLA-4	PR	25.3963	0
IMSI_0195	Nipicol	39	Male	MSI	NA	RNAseq	Anti-PD1 | Anti-CTLA-4	PR	24.8378	0
IMSI_0181	Nipicol	64	Female	MSI	NA	RNAseq	Anti-PD1 | Anti-CTLA-4	SD	5.51951	0
IMSI_0187	Nipicol	38	Male	MSI	NA	RNAseq	Anti-PD1 | Anti-CTLA-4	SD	25.4292	0
IMSI_0180	Nipicol	58	Female	MSI	NA	RNAseq	Anti-PD1 | Anti-CTLA-4	SD	5.55236	0
IMSI_0151	Nipicol	32	Male	MSI	Exome	RNAseq	Anti-PD1 | Anti-CTLA-4	SD	25.0349	0
IMSI_0152	Nipicol	39	Male	MSI	Exome	RNAseq	Anti-PD1 | Anti-CTLA-4	PR	24.8049	0
IMSI_0179	Nipicol	60	Female	MSI	NA	RNAseq	Anti-PD1 | Anti-CTLA-4	SD	23.8522	0
IMSI_0146	Nipicol	63	Female	MSI	Exome	RNAseq	Anti-PD1 | Anti-CTLA-4	SD	24.8049	0
IMSI_0159	Nipicol	66	Male	MSI	NA	RNAseq	Anti-PD1 | Anti-CTLA-4	SD	8.64066	1
IMSI_0155	Nipicol	52	Male	MSI	Exome	RNAseq	Anti-PD1 | Anti-CTLA-4	SD	21.8152	0
IMSI_0189	Nipicol	63	Female	MSI	NA	RNAseq	Anti-PD1 | Anti-CTLA-4	SD	21.9795	0
IMSI_0154	Nipicol	49	Male	MSI	Exome	RNAseq	Anti-PD1 | Anti-CTLA-4	CR	10.9733	0
IMSI_0163	Nipicol	57	Female	MSI	Exome	RNAseq	Anti-PD1 | Anti-CTLA-4	SD	4.89528	1
IMSI_0156	Nipicol	63	Male	MSI	Exome	RNAseq	Anti-PD1 | Anti-CTLA-4	PR	14.6858	0
IMSI_0173	Nipicol	68	Male	MSI	NA	RNAseq	Anti-PD1 | Anti-CTLA-4	iSD	21.6181	0
IMSI_0160	Nipicol	65	Male	MSI	Exome	RNAseq	Anti-PD1 | Anti-CTLA-4	SD	3.81109	1
IMSI_0165	Nipicol	54	Female	MSI	Exome	RNAseq	Anti-PD1 | Anti-CTLA-4	PR	22.2094	0
IMSI_0190	Nipicol	46	Male	MSI	NA	RNAseq	Anti-PD1 | Anti-CTLA-4	SD	22.2423	0
IMSI_0191	Nipicol	65	Male	MSI	NA	RNAseq	Anti-PD1 | Anti-CTLA-4	PR	13.963	0
IMSI_0158	Nipicol	58	Female	MSI	Exome	RNAseq	Anti-PD1 | Anti-CTLA-4	PR	14.2259	0
IMSI_0194	Nipicol	72	Male	MSI	NA	RNAseq	Anti-PD1 | Anti-CTLA-4	PR	4.27105	1
IMSI_0175	Nipicol	44	Male	MSI	Exome	RNAseq	Anti-PD1 | Anti-CTLA-4	SD	19.2526	0
IMSI_0147	Nipicol	22	Male	MSI	Exome	RNAseq	Anti-PD1 | Anti-CTLA-4	SD	15.7043	0
IMSI_0162	Nipicol	66	Male	MSI	Exome	RNAseq	Anti-PD1 | Anti-CTLA-4	CR	19.2197	0
IMSI_0185	Nipicol	32	Male	MSI	Exome	RNAseq	Anti-PD1 | Anti-CTLA-4	NE	1.31417	1
IMSI_0161	Nipicol	50	Male	MSI	NA	RNAseq	Anti-PD1 | Anti-CTLA-4	SD	8.08214	0
IMSI_0148	Nipicol	31	Male	MSI	Exome	RNAseq	Anti-PD1 | Anti-CTLA-4	PR	18.0698	0
IMSI_0186	Nipicol	36	Male	MSI	Exome	RNAseq	Anti-PD1 | Anti-CTLA-4	PR	13.8316	0
IMSI_0184	Nipicol	36	Female	MSI	NA	RNAseq	Anti-PD1 | Anti-CTLA-4	NE	0.62423	1
IMSI_0169	Nipicol	33	Male	MSI	NA	RNAseq	Anti-PD1 | Anti-CTLA-4	PR	12.8131	0
IMSI_0167	Nipicol	61	Male	MSI	Exome	RNAseq	Anti-PD1 | Anti-CTLA-4	SD	18.3655	0
IMSI_0177	Nipicol	59	Female	MSI	NA	RNAseq	Anti-PD1 | Anti-CTLA-4	NE	1.11704	1
IMSI_0193	Nipicol	59	Male	MSI	NA	RNAseq	Anti-PD1 | Anti-CTLA-4	SD	18.4312	0
IMSI_0171	Nipicol	69	Male	MSI	NA	RNAseq	Anti-PD1 | Anti-CTLA-4	iSD	3.67967	0
IMSI_0164	Nipicol	62	Female	MSI	Exome	RNAseq	Anti-PD1 | Anti-CTLA-4	uPD	0.62423	1
IMSI_0178	Nipicol	76	Female	MSI	NA	RNAseq	Anti-PD1 | Anti-CTLA-4	SD	12.7474	0
IMSI_0166	Nipicol	61	Female	MSI	NA	RNAseq	Anti-PD1 | Anti-CTLA-4	SD	3.97536	0
IMSI_0192	Nipicol	37	Male	MSI	NA	RNAseq	Anti-PD1 | Anti-CTLA-4	SD	5.38809	1
IMSI_0172	Nipicol	56	Male	MSI	Exome	RNAseq	Anti-PD1 | Anti-CTLA-4	SD	16.46	0
IMSI_0170	Nipicol	64	Female	MSI	Exome	RNAseq	Anti-PD1 | Anti-CTLA-4	PR	13.6016	0
IMSI_0168	Nipicol	77	Female	MSI	Exome	RNAseq	Anti-PD1 | Anti-CTLA-4	PR	14.2259	0
IMSI_0149	Nipicol	65	Female	MSS	Exome	RNAseq	Anti-PD1 | Anti-CTLA-4	uPD	2.52977	1
IMSI_0157	Nipicol	51	Female	MSS	Exome	RNAseq	Anti-PD1 | Anti-CTLA-4	uPD	4.13963	1
IMSI_0183	Nipicol	52	Female	MSS	Exome	RNAseq	Anti-PD1 | Anti-CTLA-4	PR	13.5359	0
RICKI-070T	ImmunoMSI	82	Female	MSI	Targeted Sequencing	RNAseq	Anti-PD1 | Anti-CTLA-4	PR	59.2667	0
RICKI-053T	ImmunoMSI	43	Male	MSI	Targeted Sequencing	RNAseq	Anti-PD1 | Anti-CTLA-4	CR	59.3667	0
RICKI-060T	ImmunoMSI	52	Male	MSI	Targeted Sequencing	RNAseq	Anti-PD1 | Anti-CTLA-4	PD	2.66667	1
RICKI-001T	ImmunoMSI	73	Male	MSI	Targeted Sequencing	RNAseq	Anti-PD1	CR	66.0333	0
RICKI-054T	ImmunoMSI	79	Male	MSI	Targeted Sequencing	RNAseq	Anti-PD1 | Anti-CTLA-4	PR	61.871	0
RICKI-009T	ImmunoMSI	89	Female	MSI	Targeted Sequencing	RNAseq	Anti-PD1	PR	22.7742	0
RICKI-071T	ImmunoMSI	60	Male	MSI	Targeted Sequencing	RNAseq	Anti-PD1 | Anti-CTLA-4	CR	60.2667	0
RICKI-008T	ImmunoMSI	34	Male	MSI	Targeted Sequencing	RNAseq	Anti-PD1	CR	46.4333	0
RICKI-064T	ImmunoMSI	74	Male	MSI	Targeted Sequencing	RNAseq	Anti-PD1	PD	16.7667	1
RICKI-072T	ImmunoMSI	66	Male	MSI	Targeted Sequencing	RNAseq	Anti-PD1	SD	18.1786	0
RICKI-055T	ImmunoMSI	69	Female	MSI	Targeted Sequencing	RNAseq	Anti-PD1 | Anti-CTLA-4	SD	49.3226	1
RICKI-002T	ImmunoMSI	64	Female	MSI	Targeted Sequencing	RNAseq	Anti-PD1	PD	29	1
RICKI-073T	ImmunoMSI	48	Male	MSI	Targeted Sequencing	RNAseq	Anti-PD1 | Anti-CTLA-4	PR	61.1333	0
RICKI-065T	ImmunoMSI	64	Female	MSI	Targeted Sequencing	RNAseq	Anti-PD1	CR	64.3667	0
RICKI-066T	ImmunoMSI	65	Male	MSI	Targeted Sequencing	RNAseq	Anti-PD1	CR	76.2667	0
RICKI-074T	ImmunoMSI	64	Female	MSI	Targeted Sequencing	RNAseq	Anti-PD1 | Anti-CTLA-4	PR	71.8	0
RICKI-067T	ImmunoMSI	34	Male	MSI	Targeted Sequencing	RNAseq	Anti-PD1	CR	63.4333	0
RICKI-075T	ImmunoMSI	47	Female	MSI	Targeted Sequencing	RNAseq	Anti-PD1 | Anti-CTLA-4	PR	61.4667	0
RICKI-048T	ImmunoMSI	61	Male	MSI	Targeted Sequencing	RNAseq	Anti-PD1 | Anti-CTLA-4	PD	19.0645	1
RICKI-069T	ImmunoMSI	55	Male	MSI	Targeted Sequencing	RNAseq	Anti-PD1	CR	64.0667	0
RICKI-076T	ImmunoMSI	35	Female	MSI	Targeted Sequencing	RNAseq	Anti-PD1 | Anti-CTLA-4	CR	62.7419	0
RICKI-062T	ImmunoMSI	50	Male	MSI	Targeted Sequencing	RNAseq	Anti-PD1	PD	9.74194	1
RICKI-077T	ImmunoMSI	65	Female	MSI	Targeted Sequencing	RNAseq	Anti-PD1 | Anti-CTLA-4	PR	10.9667	1
RICKI-049T	ImmunoMSI	77	Female	MSI	Targeted Sequencing	RNAseq	Anti-PD1 | Anti-CTLA-4	CR	71.9677	0
RICKI-078T	ImmunoMSI	26	Male	MSI	Targeted Sequencing	RNAseq	Anti-PD1 | Anti-CTLA-4	PR	60.7097	0
RICKI-046T	ImmunoMSI	60	Male	MSI	Targeted Sequencing	RNAseq	Anti-PD1 | Anti-CTLA-4	CR	60.0333	0
RICKI-079T	ImmunoMSI	49	Male	MSI	Targeted Sequencing	RNAseq	Anti-PD1 | Anti-CTLA-4	CR	59.7419	0
RICKI-080T	ImmunoMSI	53	Male	MSI	Targeted Sequencing	RNAseq	Anti-PD1 | Anti-CTLA-4	PR	60.0667	0
RICKI-081T	ImmunoMSI	59	Male	MSI	Targeted Sequencing	RNAseq	Anti-PD1 | Anti-CTLA-4	PR	53.7742	0
RICKI-082T	ImmunoMSI	58	Male	MSI	Targeted Sequencing	RNAseq	Anti-PD1 | Anti-CTLA-4	PR	62.5	0
RICKI-005T	ImmunoMSI	33	Male	MSI	Targeted Sequencing	RNAseq	Anti-PD1	CR	41.3667	0
RICKI-006T	ImmunoMSI	45	Female	MSI	Targeted Sequencing	RNAseq	Anti-PD1	PR	35.8333	0
RICKI-026T	ImmunoMSI	62	Male	MSI	Targeted Sequencing	RNAseq	Anti-PD1	PR	32.4	0
RICKI-007T	ImmunoMSI	74	Female	MSI	Targeted Sequencing	RNAseq	Anti-PD1	SD	14.5484	1
RICKI-003T	ImmunoMSI	70	Male	MSI	Targeted Sequencing	RNAseq	Anti-PD1	PR	67.8667	0
RICKI-061T	ImmunoMSI	77	Male	MSI	Targeted Sequencing	RNAseq	Anti-PD1 | Anti-CTLA-4	PD	18.2258	1
RICKI-017T	ImmunoMSI	55	Female	MSI	Targeted Sequencing	RNAseq	Anti-PD1	PR	31.6	0
RICKI-016T	ImmunoMSI	50	Male	MSI	Targeted Sequencing	RNAseq	Anti-PD1	PR	29.7333	0
RICKI-025T	ImmunoMSI	63	Female	MSI	Targeted Sequencing	RNAseq	Anti-PD1	PR	28.7333	0
RICKI-018T	ImmunoMSI	67	Male	MSI	Targeted Sequencing	RNAseq	Anti-PD1	PR	29.5667	0
RICKI-022T	ImmunoMSI	65	Female	MSI	Targeted Sequencing	RNAseq	Anti-PD1	PR	2.64286	1
RICKI-023T	ImmunoMSI	61	Female	MSI	Targeted Sequencing	RNAseq	Anti-PD1	CR	28.8	0
RICKI-024T	ImmunoMSI	72	Male	MSI	Targeted Sequencing	RNAseq	Anti-PD1	CR	27.2	0
RICKI-011T	ImmunoMSI	51	Male	MSI	Targeted Sequencing	RNAseq	Anti-PD1	PR	27.5333	0
RICKI-019T	ImmunoMSI	48	Male	MSI	Targeted Sequencing	RNAseq	Anti-PD1	CR	27.1	0
RICKI-021T	ImmunoMSI	59	Female	MSI	Targeted Sequencing	RNAseq	Anti-PD1	PD	3.80645	1
RICKI-028T	ImmunoMSI	52	Male	MSI	Targeted Sequencing	RNAseq	Anti-PD1	SD	21.0333	0
RICKI-020T	ImmunoMSI	72	Male	MSI	Targeted Sequencing	RNAseq	Anti-PD1 | Anti-CTLA-4	CR	20.9333	0
RICKI-029T	ImmunoMSI	37	Male	MSI	Targeted Sequencing	RNAseq	Anti-PD1	PR	20.4667	0
RICKI-012T	ImmunoMSI	78	Male	MSI	Targeted Sequencing	RNAseq	Anti-PD1	PR	15.3226	1
RICKI-013T	ImmunoMSI	67	Female	MSI	Targeted Sequencing	RNAseq	Anti-PD1	CR	18.8333	0
RICKI-084T	ImmunoMSI	70	Female	MSI	Targeted Sequencing	RNAseq	Anti-PD1	PR	17.0667	0
RICKI-031T	ImmunoMSI	62	Male	MSI	Targeted Sequencing	RNAseq	Anti-PD1	PR	18.7333	0
RICKI-037T	ImmunoMSI	57	Male	MSI	Targeted Sequencing	RNAseq	Anti-PD1	PR	18.1667	0
RICKI-038T	ImmunoMSI	59	Male	MSI	Targeted Sequencing	RNAseq	Anti-PD1	PR	17.3667	0
RICKI-039T	ImmunoMSI	33	Male	MSI	Targeted Sequencing	RNAseq	Anti-PD1 | Anti-CTLA-4	PR	16.6	0
RICKI-014T	ImmunoMSI	61	Female	MSI	Targeted Sequencing	RNAseq	Anti-PD1	SD	1.19355	0
RICKI-040T	ImmunoMSI	28	Male	MSI	Targeted Sequencing	RNAseq	Anti-PD1	CR	16.3667	0
RICKI-041T	ImmunoMSI	61	Female	MSI	Targeted Sequencing	RNAseq	Anti-PD1 | Anti-CTLA-4	PR	16.3333	0
RICKI-033T	ImmunoMSI	78	Female	MSI	Targeted Sequencing	RNAseq	Anti-PD1	PR	16.0323	0
RICKI-042T	ImmunoMSI	65	Female	MSI	Targeted Sequencing	RNAseq	Anti-PD1 | Anti-CTLA-4	PR	15.7667	0
RICKI-043T	ImmunoMSI	75	Male	MSI	Targeted Sequencing	RNAseq	Anti-PD1	PR	15.5667	0
RICKI-035T	ImmunoMSI	58	Female	MSI	Targeted Sequencing	RNAseq	Anti-PD1 | Anti-CTLA-4	PR	15.3667	0
RICKI-045T	ImmunoMSI	58	Female	MSI	Targeted Sequencing	RNAseq	Anti-PD1 | Anti-CTLA-4	PD	8.43333	1
RICKI-044T	ImmunoMSI	43	Male	MSI	Targeted Sequencing	RNAseq	Anti-PD1	PR	11.9333	0
RICKI-015T	ImmunoMSI	83	Female	MSI	Targeted Sequencing	RNAseq	Anti-PD1	PR	13.9667	0
RICKI-030T	ImmunoMSI	36	Male	MSI	Targeted Sequencing	RNAseq	Anti-PD1	ND	6.86667	1
RICKI-032T	ImmunoMSI	40	Male	MSI	Targeted Sequencing	RNAseq	Anti-PD1	PR	10.4	0
RICKI-051T	ImmunoMSI	27	Male	MSI	Targeted Sequencing	RNAseq	Anti-PD1	SD	8.26667	0
RICKI-050T	ImmunoMSI	72	Female	MSI	Targeted Sequencing	RNAseq	Anti-PD1 | Anti-CTLA-4	CR	7.16129	0
RICKI-083T	ImmunoMSI	70	Male	MSI	Targeted Sequencing	RNAseq	Anti-PD1 | Anti-CTLA-4	SD	3.9	0
RICKI-058T	ImmunoMSI	#N/A	#N/A	MSI	Targeted Sequencing	RNAseq	#N/A	NA	#N/A	#N/A
RICKI-059T	ImmunoMSI	#N/A	#N/A	MSI	Targeted Sequencing	RNAseq	#N/A	NA	#N/A	#N/A
