# Supplementary figures and images for: Prediction of Response to Immune Checkpoint Blockade in Patients with Metastatic Colorectal Cancer with Microsatellite Instability
Source: Research Square preprint supplement (doi:10.21203/rs.3.rs-1650336/v1), 2022-05-31

Before exclusion of MSS samples

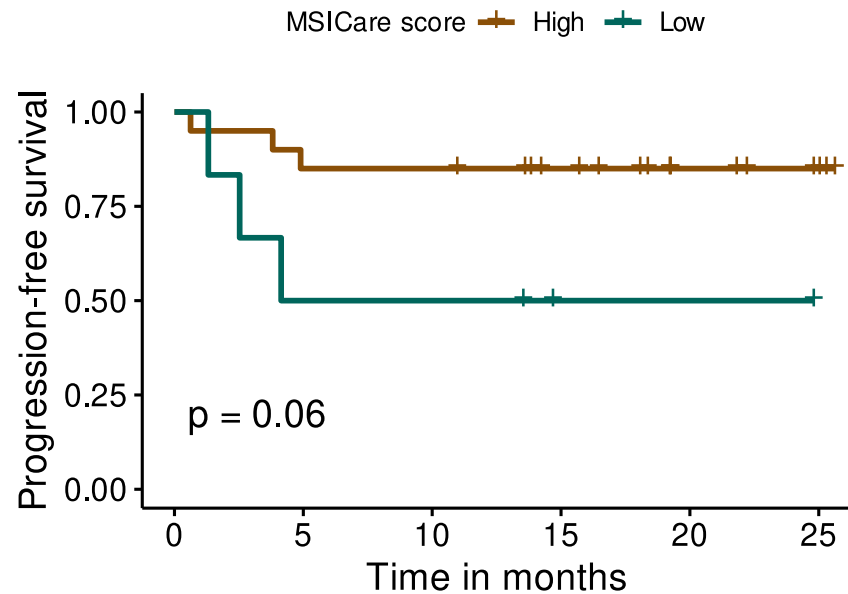

After exclusion of MSS samples

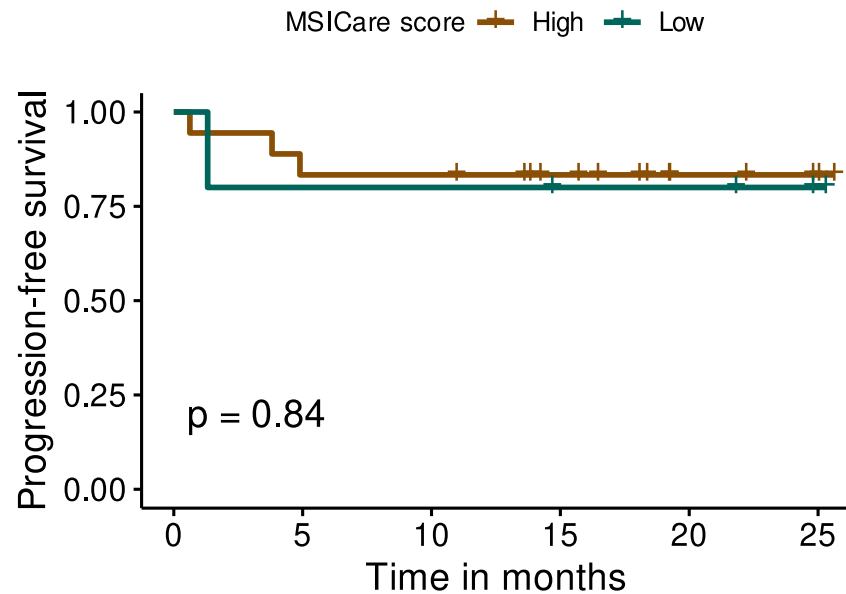

Supplement: Supplementary file 1 [file 69cf73c0e6f9b51086025624.pdf]
